# Supplementary material
Source: PubMed Central journal article supplement (PMC2443830)
Supplement: mmc1.pdf [file mmc1.pdf]

## Supplemental Data

### Neuropsychological Endophenotype Approach to Genome-wide

### Linkage Analysis Identifies Susceptibility Loci

### for ADHD on 2q21.1 and 13q12.11

Nanda N.J. Rommelse, Alejandro Arias-Vásquez, Marieke E. Altink, Cathelijne J.M. Buschgens, Ellen Fliers, Stephen V. Faraone, Jan K. Buitelaar, Joseph A. Sergeant, Jaap Oosterlaan, and Barbara Franke

Figure S1. Genome-wide LOD Scores for the Eight Individual Neuropsychological Measures and the Combined Score

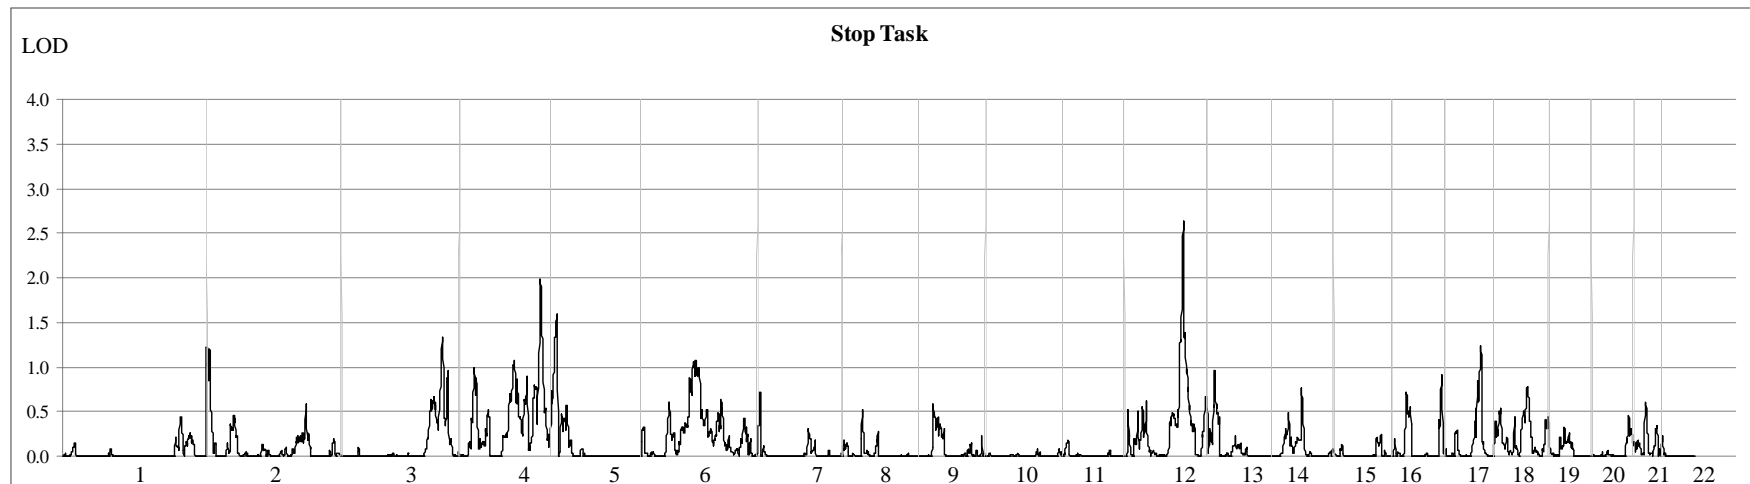

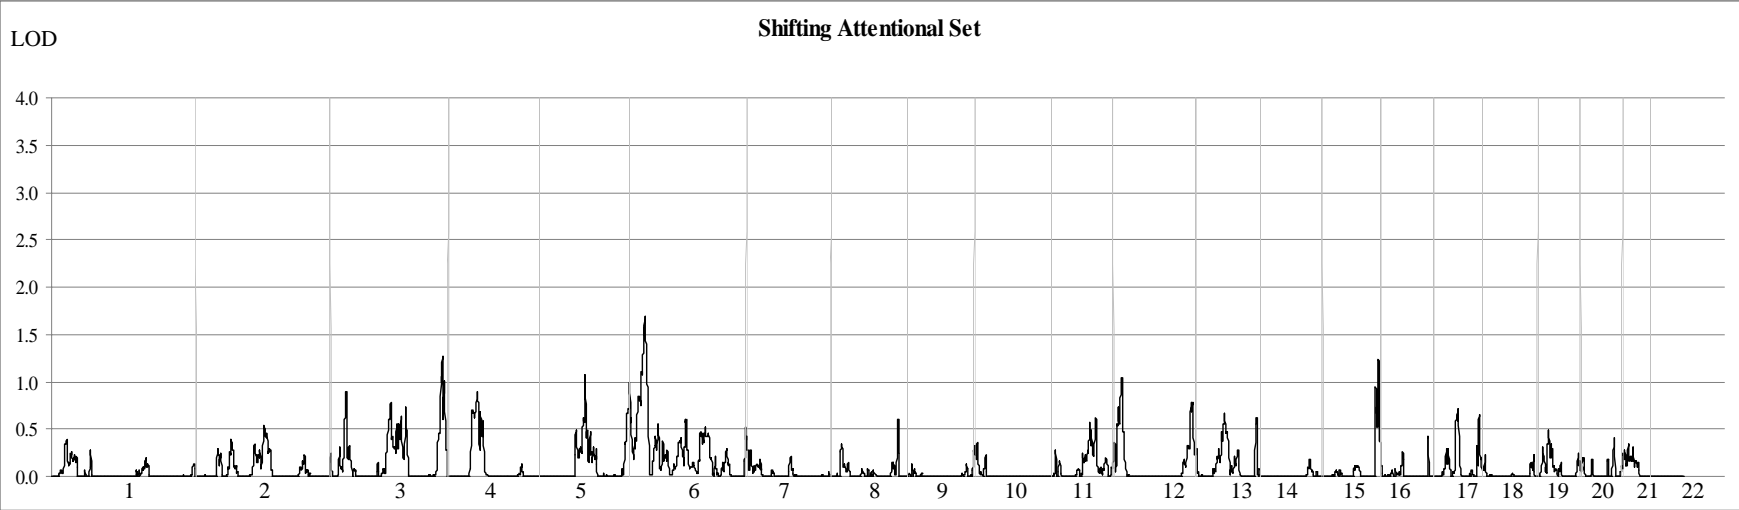

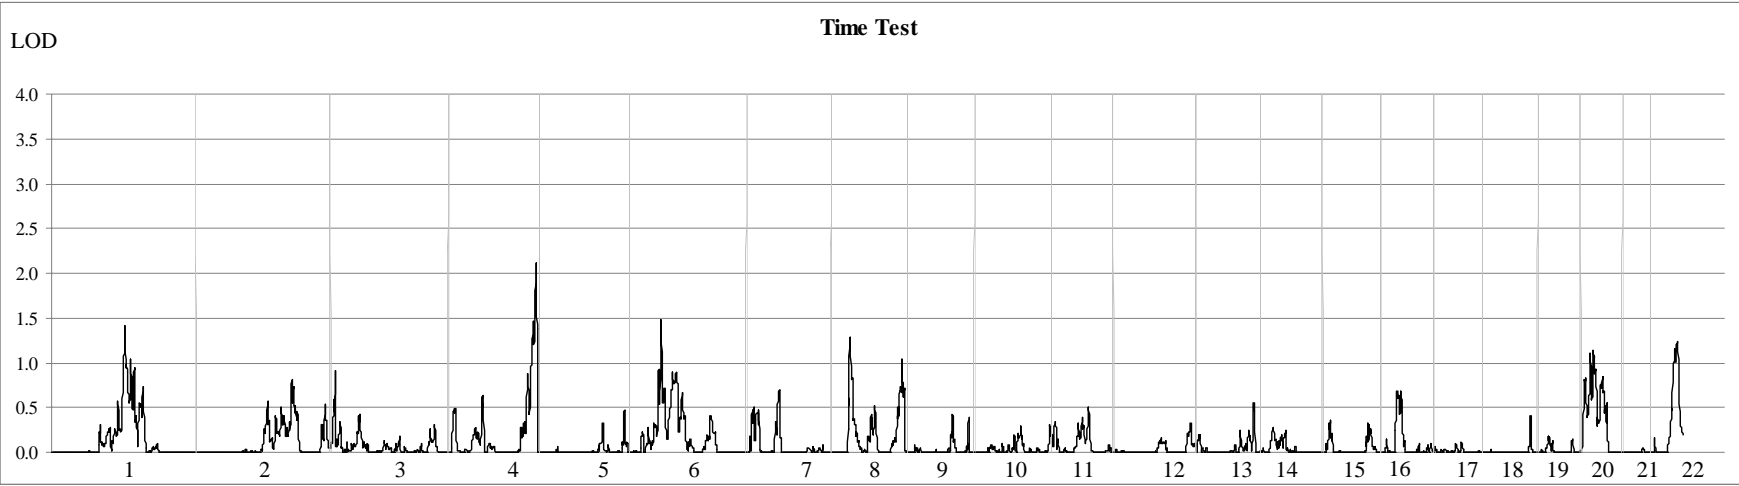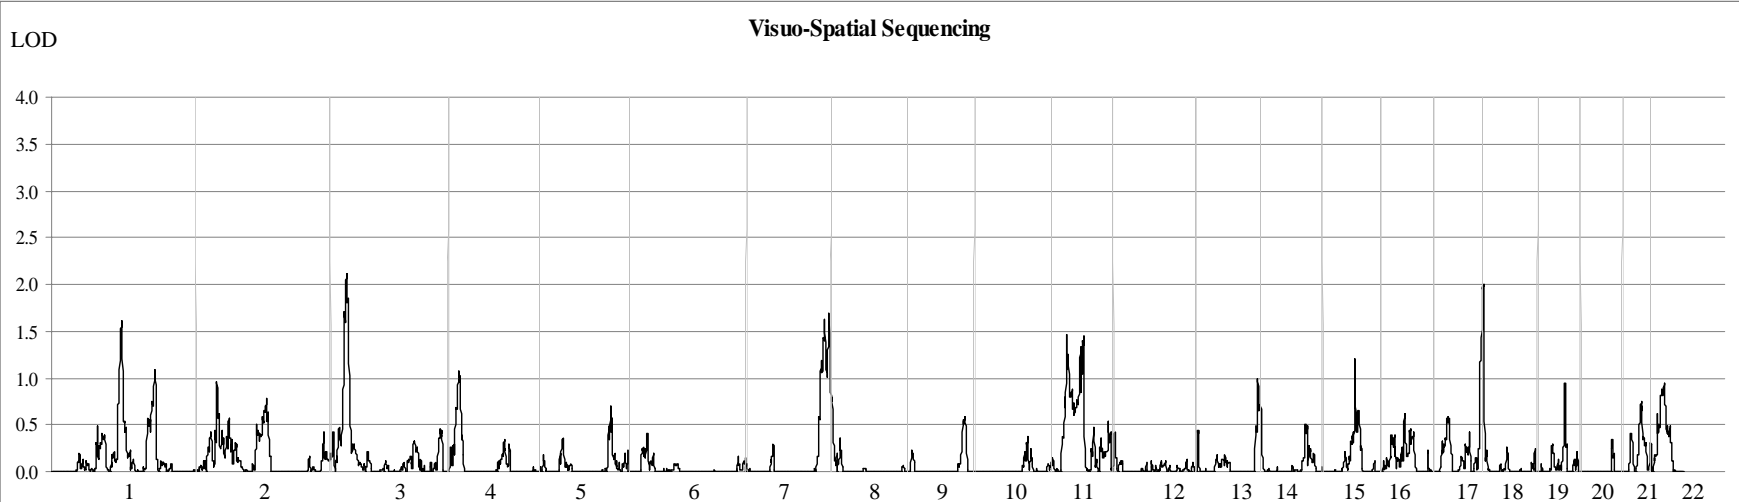

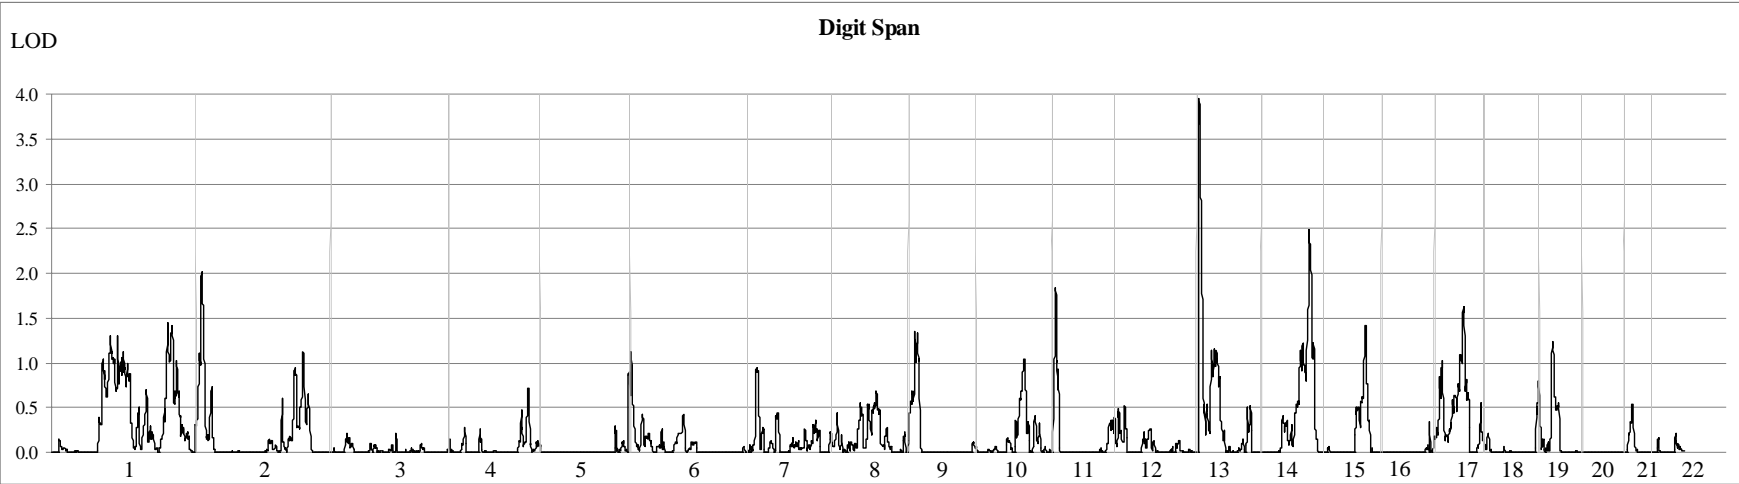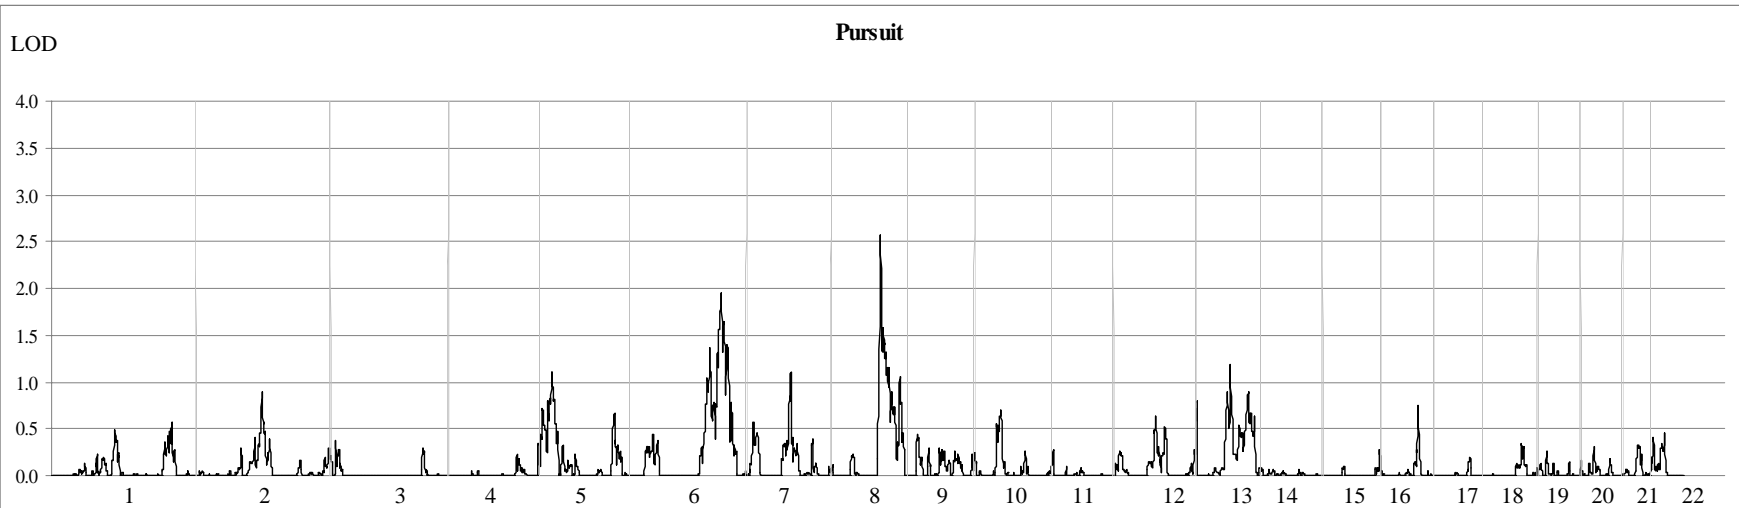

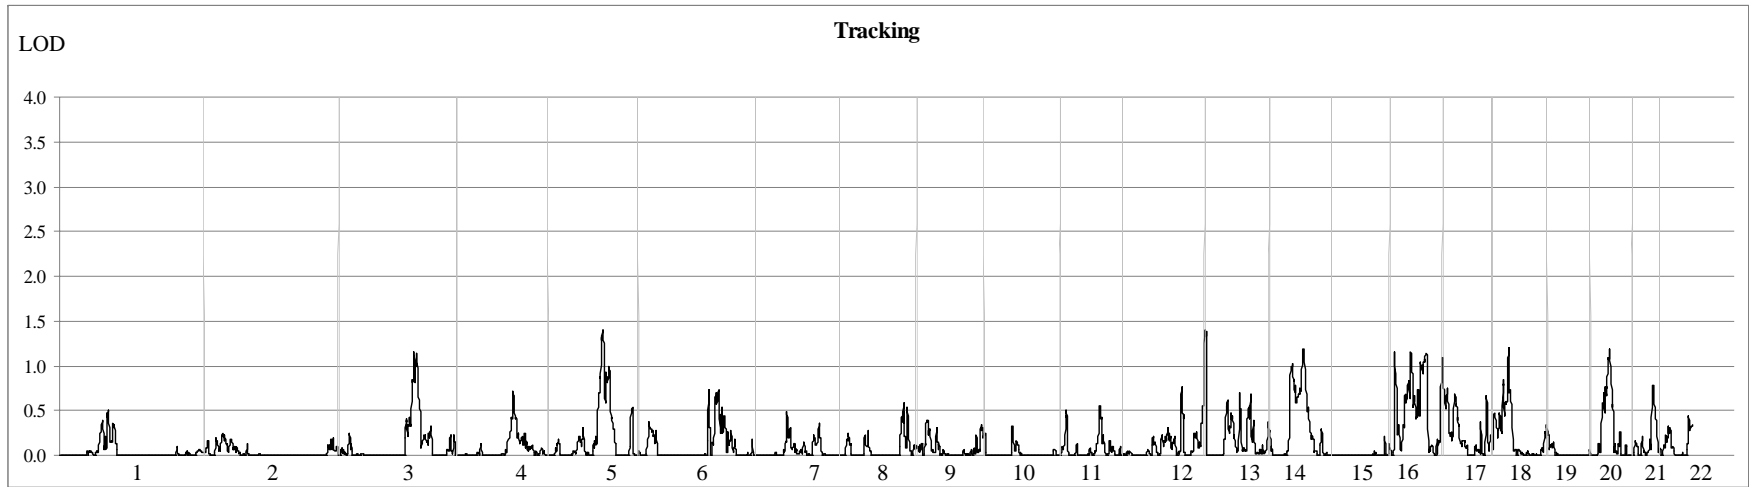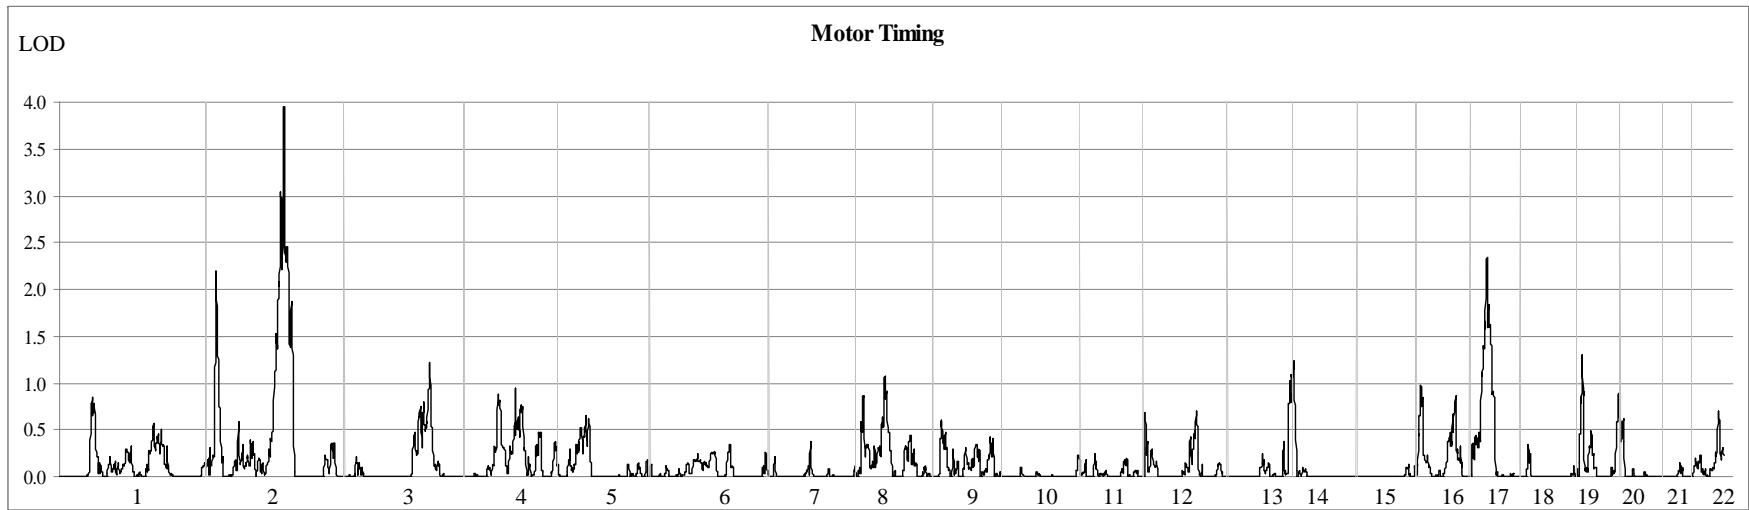

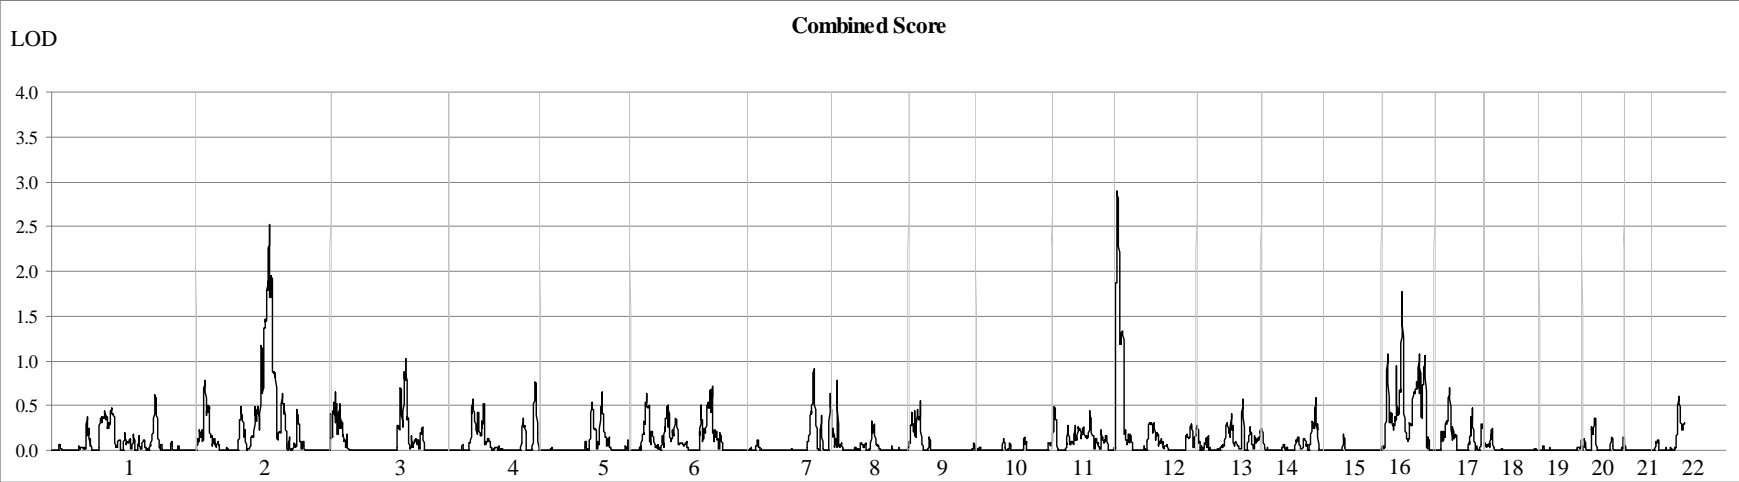

**Table S1. Possible Candidate Genes within the Linkage Signals on Chromosomes 2 and 13**

| Name                               | Function                                                                                                                                                                                                                                                                                                                                                     |
|------------------------------------|--------------------------------------------------------------------------------------------------------------------------------------------------------------------------------------------------------------------------------------------------------------------------------------------------------------------------------------------------------------|
| Chromosome 2                       |                                                                                                                                                                                                                                                                                                                                                              |
| <i>EN1</i>                         | Coding for Engrailed homeobox 1, a component of the Wnt signalling pathway involved in pattern formation during development of the central nervous system.                                                                                                                                                                                                   |
| <i>DBI</i>                         | Encoding the diazepam binding inhibitor, a protein involved in the displacement of benzodiazepines, drugs that modulate signal transduction in brain synapses.                                                                                                                                                                                               |
| <i>SCTR</i>                        | Coding for a G protein-coupled receptor possibly involved in autism.                                                                                                                                                                                                                                                                                         |
| <i>CNTNAP5</i>                     | Gene product functions as a cell adhesion molecule and receptor in the nervous system.                                                                                                                                                                                                                                                                       |
| <i>BINI</i>                        | May be involved in synaptic vesicle endocytosis in the central nervous system.                                                                                                                                                                                                                                                                               |
| <i>PTPN18</i>                      | Involved in cell growth and differentiation in the brain.                                                                                                                                                                                                                                                                                                    |
| <i>TUBA3E</i> and<br><i>TUBA3D</i> | Expressed in the brain and possibly their function is related to that of the genes in the <i>TUBA1</i> family, which have been associated with abnormalities in the laminar architecture of the hippocampus and cortex accompanied by impaired neuronal migration in mouse mutants and showed association with lissencephaly in humans (Keays et al., 2007). |
| Chromosome 13                      |                                                                                                                                                                                                                                                                                                                                                              |
| <i>TUBA3C</i>                      | See <i>TUBA3E</i> and <i>TUBA3D</i> .                                                                                                                                                                                                                                                                                                                        |
| <i>FGF9</i>                        | Encodes a fibroblast growth factor with a possible role in glial cell development in the nervous system.                                                                                                                                                                                                                                                     |
